# Supplementary material
Source: publisher figshare collection journal article supplement (https://acs.figshare.com/ndownloader/files/23622545)
Supplement: Supplementary file 1 [file 23622545]

# Supporting Information

## Calorimetric determination of the formation enthalpies of Cs polymolybdates at 298.15 K and 0.1 MPa

*Pierre Benigni*\* ([p.benigni@univ-amu.fr](mailto:p.benigni@univ-amu.fr)), *Georges Mikaelian*, *Elise Ruiz*, *Carine Perrin-Pellegrino*, *Jacques Rogez*

Aix Marseille Univ., Université de Toulon, CNRS, IM2NP, Marseille, France

---

\* Corresponding author.

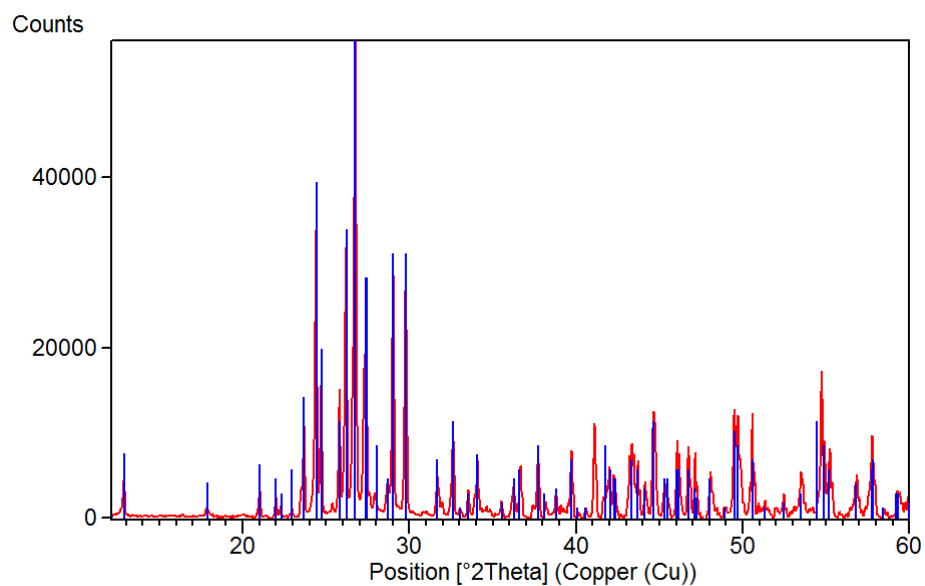

Figure S1. Diffractogram of the powdered  $\text{Cs}_2\text{Mo}_2\text{O}_7$  sample from this work (in red) compared with the reference pattern PDF-2 00-039-0060 of  $\text{Cs}_2\text{Mo}_2\text{O}_7$  (in blue).

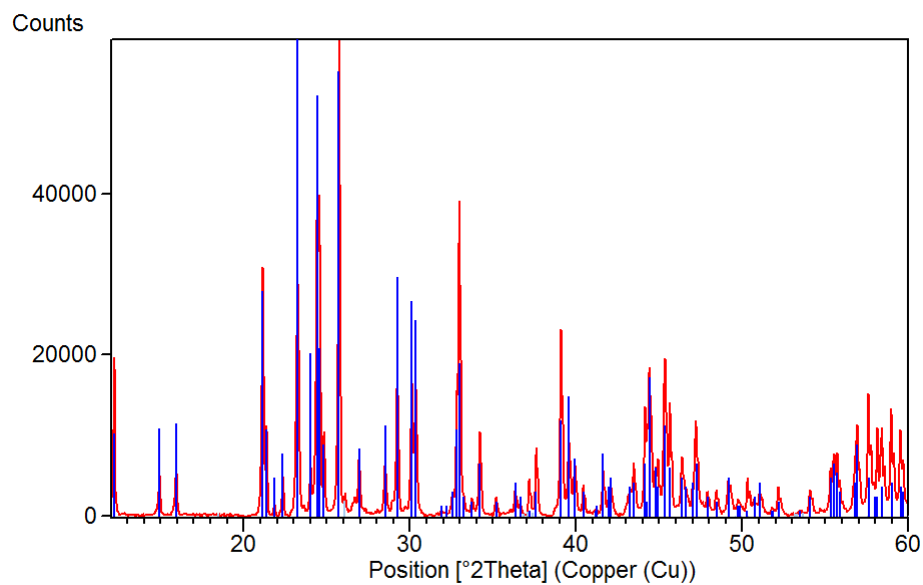

Figure S2. Diffractogram of the powdered  $\text{Cs}_2\text{Mo}_3\text{O}_{10}$  sample from this work (in red) compared with the reference pattern PDF-2 00-034-0059 of  $\text{Cs}_2\text{Mo}_3\text{O}_{10}$  (in blue).

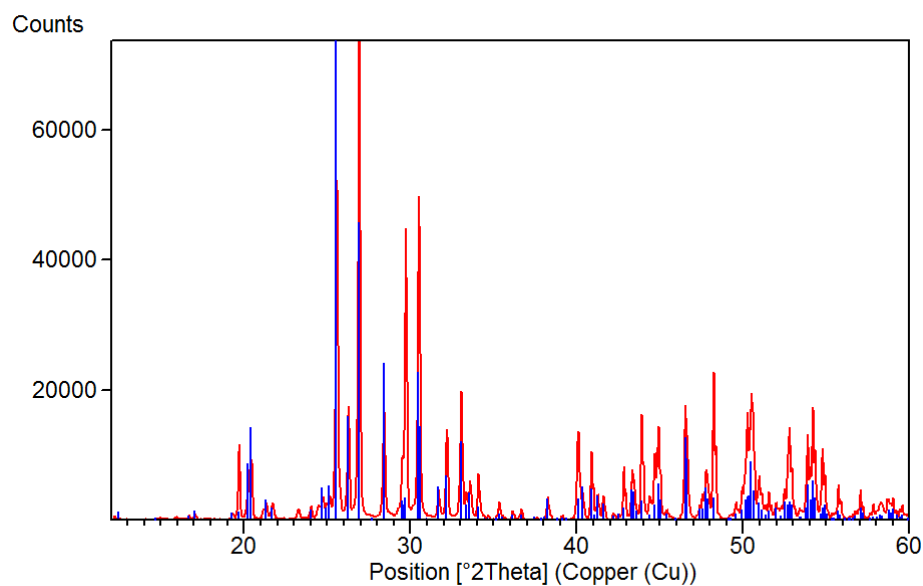

Figure S3. Diffractogram of the powdered  $\text{Cs}_2\text{Mo}_5\text{O}_{16}$  sample from this work (in red) compared with the reference pattern PDF-2 01-070-0861 of  $\text{Cs}_2\text{Mo}_5\text{O}_{16}$  (in blue).

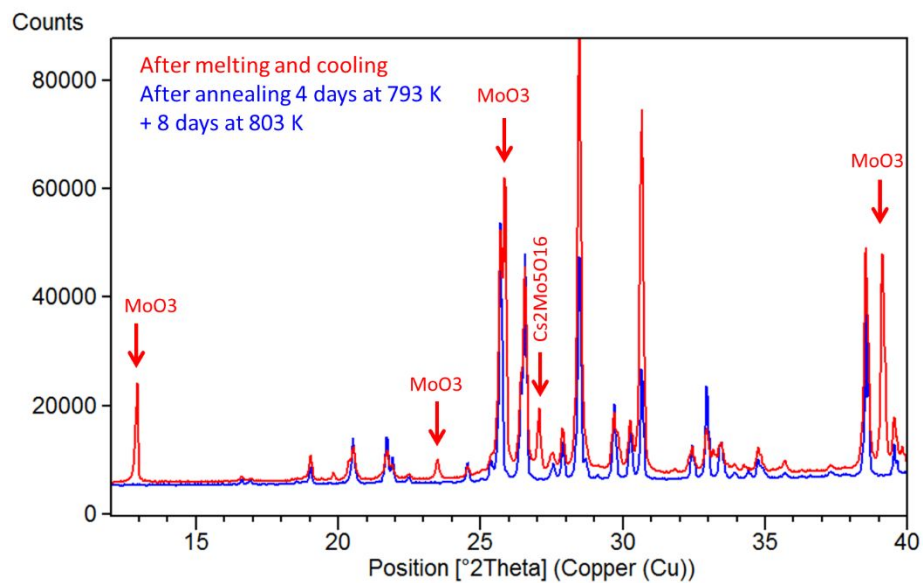

Figure S4. Comparison between the diffractograms obtained on the powdered  $\text{Cs}_2\text{Mo}_7\text{O}_{22}$  sample after melting and cooling (in red) and after the annealing treatment (in blue).

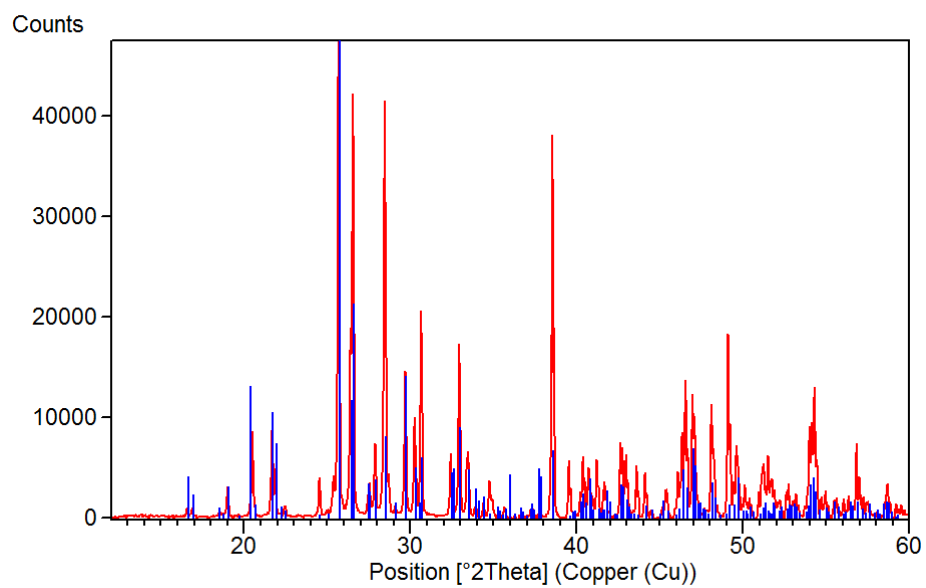

Figure S5. Diffractogram of the annealed  $\text{Cs}_2\text{Mo}_7\text{O}_{22}$  sample from this work (in red) compared with the reference pattern PDF-2 01-070-0862 of  $\text{Cs}_2\text{Mo}_7\text{O}_{22}$  (in blue).
